# Supplementary material
Source: MDPI journal article supplement (https://www.mdpi.com/2071-1050/11/11/3223)
Supplement: s1 [file s1]

**Table S1.** *Cephus cinctus* infestation and its parasitoid abundance in spring and winter wheat fields inside more intensively managed landscape of Golden Triangle, Montana, USA and outside.

| Wheat type   | Infestation status            | Outside Golden Triangle |        |         | Golden Triangle |        |         | t-test |
|--------------|-------------------------------|-------------------------|--------|---------|-----------------|--------|---------|--------|
|              |                               | Observations            | Mean   | Std Dev | Observations    | Mean   | Std Dev |        |
| Spring wheat | Stems infested                | 1509                    | 35.67% | 0.33    | 629             | 17.58% | 0.26    | ***    |
|              | Stems with parasitized larvae | 1509                    | 8.63%  | 0.18    | 629             | 5.35%  | 0.18    | ***    |
|              | Stems cut by mature larvae    | 1509                    | 14.35% | 0.21    | 629             | 9.80%  | 0.20    | ***    |
| Winter wheat | Stems infested                | 436                     | 39.21% | 0.30    | 1264            | 48.81% | 0.36    | ***    |
|              | Stems with parasitized larvae | 436                     | 4.21%  | 0.11    | 1264            | 6.84%  | 0.19    | ***    |
|              | Stems cut by mature larvae    | 436                     | 11.23% | 0.14    | 1264            | 23.96% | 0.26    | ***    |

The table is adopted from Bekkerman and Weaver [48]. \*\*\* $P < 0.0001$

**Table S2.** Estimated pest regulation service values by parasitoids of *Cephus cinctus* in Montana, USA. To estimate the values, a counterfactual analysis was done on *C. cinctus* infested spring and winter wheat stems and parasitoids presence on infested stems with four scenarios: base case, zero parasitoids, 2x parasitoids, and parasitoids in 30% of infested stems.

|                                                                                                                                                | Base Case      | Zero parasitoids | 2x parasitoids | 30% of infested stems contain parasitized larvae |
|------------------------------------------------------------------------------------------------------------------------------------------------|----------------|------------------|----------------|--------------------------------------------------|
| Average # of infested stems                                                                                                                    | 45.99%         | 45.99%           | 45.99%         | 62.00%                                           |
| Average # of cut stems                                                                                                                         | 15.15%         | 18.34%           | 8.76%          | 5.41%                                            |
| Average # of stems with parasitoids                                                                                                            | 3.20%          | 0.00%            | 6.39%          | 13.90%                                           |
| Change relative to base case                                                                                                                   |                | -3.01%           | 3.10%          | 21.24%                                           |
| Average estimated annual production loss in Montana over the past 10 years (SW; Spring wheat, in metric tons)                                  | 80,714         | 83,142           | 78,210         | 63,568                                           |
| Average estimated annual production loss in Montana over the past 10 years (WW; Winter wheat, in metric tons)                                  | 131,925        | 131,925          | 131,925        | 103,900                                          |
| <b>Average estimated total annual production loss in Montana (SW + WW)</b>                                                                     | <b>212,639</b> | <b>215,067</b>   | <b>210,135</b> | <b>167,468</b>                                   |
| Total estimated foregone revenues due to <i>C. cinctus</i> -related production losses, using average market prices over the past 10 years (SW) | \$21,222,335   | \$21,860,829     | \$20,564,036   | \$16,723,889                                     |

|                                                                                                                                                          |              |                  |                   |                      |
|----------------------------------------------------------------------------------------------------------------------------------------------------------|--------------|------------------|-------------------|----------------------|
| Total estimated foregone revenues due to <i>C. cinctus</i> -related production losses, using average market prices over the past 10 years (WW)           | \$31,574,319 | \$31,574,319     | \$31,574,319      | \$24,853,313         |
| Total estimated foregone revenues due to <i>C. cinctus</i> -related production losses, using average market prices over the past 10 years (SW + WW)      | \$52,796,654 | \$53,435,148     | \$52,138,355      | \$41,577,202         |
| <b>Change in foregone revenues due to different parasitoid scenario (relative to base; positive = additional losses; negative = reduction in losses)</b> |              | <b>\$638,494</b> | <b>-\$658,299</b> | <b>-\$11,219,452</b> |

---
